# Supplementary material for: Impacts of Infectious Dose, Feeding Behavior, and Age of Culicoides sonorensis Biting Midges on Infection Dynamics of Vesicular Stomatitis Virus
Source: MDPI journal article supplement (doi:10.3390/pathogens10070816), 2021-06-29
Supplement: s1 [file s1]

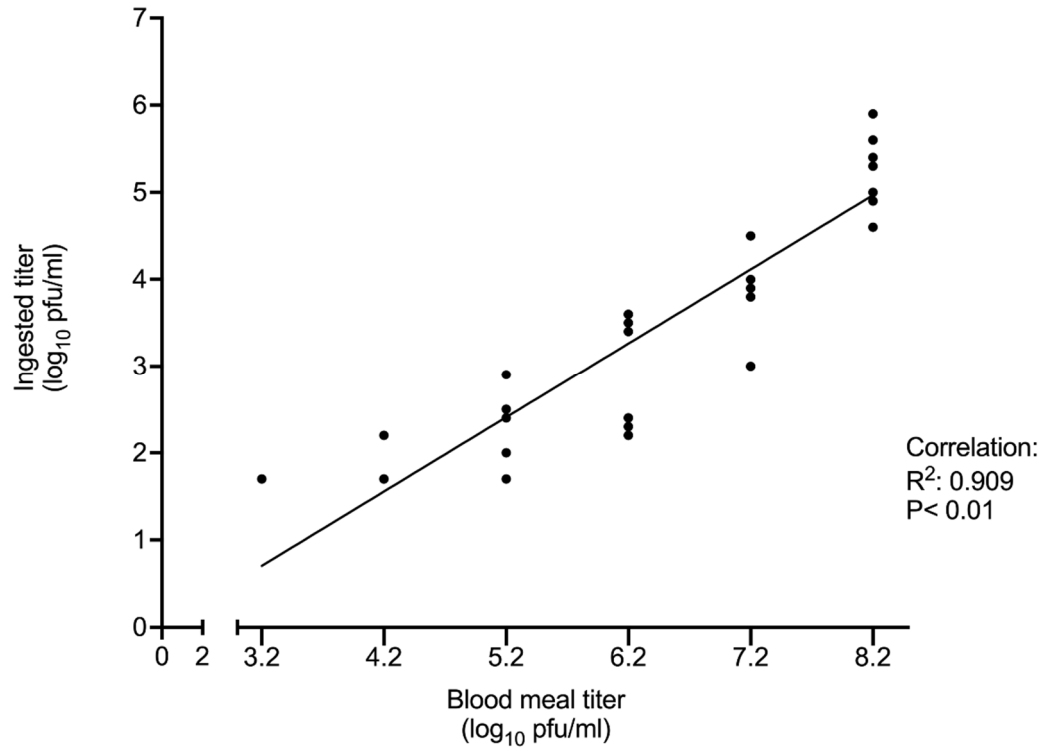

**Figure S1.** Correlation of mean VSV titers ingested by midges and the infectious blood meal doses on which they fed. Ingested titers were determined as individual whole-body homogenates plaqued on Vero cells.
